# Supplementary material for: A Transgenic Transcription Factor (TaDREB3) in Barley Affects the Expression of MicroRNAs and Other Small Non-Coding RNAs
Source: PLoS One. 2012 Aug 1;7(8):e42030. doi: 10.1371/journal.pone.0042030 (PMC3409865; doi:10.1371/journal.pone.0042030)
Supplement: Table S4 — Detected ncRNA families in the rfam database by reads (allowing 2 mismatches) in non-transgenic barley (GP) and transgenic barley (GP(TaDREB3)). The log2-ratio indicates the differential expression. Sheet 1 shows detected ncRNA families by the reads with threshold > = 1. Sheet 2 shows detected ncRNA families by the reads with threshold > = 10. (XLSX) [file pone.0042030.s004.xlsx]

## Sheet: rfam_1_2MM
name	GP	GP(TaDREB3)	GP(TaDREB3)_norm	log2
SSU_rRNA_5	30044	9932	13737.6	-1.12894
U4	3344	5884	8138.57	1.2832
tRNA	2947	2256	3120.43	0.0824984
5S_rRNA	2684	1478	2044.33	-0.39276
7SK	1846	1015	1403.92	-0.394944
Intron_gpII	1655	1457	2015.28	0.284148
mir-544	1321	900	1244.85	-0.0856552
Intron_gpI	1263	623	861.715	-0.551572
T-box	1031	679	939.172	-0.134582
U6	693	677	936.406	0.434279
SRP_euk_arch	661	454	627.959	-0.0739796
mir-548	582	308	426.016	-0.45011
MIR812	579	214	295.998	-0.967974
mir-598	563	329	455.063	-0.307069
RSV_RNA	506	278	384.521	-0.396074
5_8S_rRNA	497	322	445.381	-0.158207
SNORA7	472	328	453.68	-0.0571126
tmRNA	453	310	428.783	-0.0792644
mir-1302	446	318	439.848	-0.0200385
Cobalamin	445	286	395.587	-0.169812
MIR806	426	139	192.261	-1.14779
RNaseP_bact_a	425	249	344.409	-0.303339
U3	421	253	349.942	-0.266704
mir-562	403	228	315.363	-0.353768
U2	375	228	315.363	-0.249878
MIR1122	373	184	254.503	-0.551491
MIR821	265	129	178.429	-0.570643
Alpha_RBS	265	210	290.466	0.132375
LR-PK1	260	178	246.204	-0.078656
TPP	237	149	206.092	-0.201596
U1	234	138	190.877	-0.293862
C0719	231	65	89.906	-1.3614
mir-1255	211	128	177.046	-0.253121
SNORA61	184	78	107.887	-0.770181
Y_RNA	173	124	171.513	-0.0124535
SNORA28	167	90	124.485	-0.423873
Hammerhead_1	147	69	95.4387	-0.623169
mir-649	126	51	70.5417	-0.836876
U5	109	112	154.915	0.507149
SNORA17	101	75	103.738	0.0385856
SNORD15	95	47	65.009	-0.547288
FMN	90	41	56.71	-0.666323
UnaL2	89	56	77.4575	-0.2004
Lysine	88	39	53.9436	-0.706051
snoU13	85	36	49.7941	-0.771488
RNaseP_nuc	85	84	116.186	0.450905
6S	79	51	70.5417	-0.163377
snoZ185	76	130	179.812	1.24242
SAM	73	35	48.4109	-0.592563
Telomerase-vert	71	64	88.5229	0.318231
PK-G12rRNA	66	54	74.6912	0.178472
K_chan_RES	66	45	62.2426	-0.0845626
MPMV_package	65	44	60.8595	-0.0949578
Glycine	64	29	40.1119	-0.674041
RNaseP_bact_b	62	19	26.2802	-1.23829
SNORA11	61	44	60.8595	-0.00332732
MIR480	59	23	31.8129	-0.891103
U8	58	21	29.0466	-0.997685
mir-156	56	133	183.962	1.71591
mir-584	55	43	59.4763	0.112883
yybP-ykoY	52	27	37.3456	-0.477574
L10_leader	51	22	30.4297	-0.745015
lsrR	49	15	20.7475	-1.23984
U6atac	47	29	40.1119	-0.228629
SNORA70	45	25	34.5792	-0.380019
SRP_bact	44	36	49.7941	0.178472
snoR71	44	28	38.7288	-0.184098
snoZ199	43	36	49.7941	0.211639
IRES_Picorna	41	15	20.7475	-0.982683
SNORD113	39	13	17.9812	-1.11698
ydaO-yuaA	39	32	44.2614	0.182576
MIR169_2	37	37	51.1773	0.467978
RNase_MRP	37	38	52.5605	0.506453
SNORA2	36	15	20.7475	-0.795056
SNORA73	36	20	27.6634	-0.380019
mir-324	35	26	35.9624	0.0391351
SNORA42	35	28	38.7288	0.14605
SNORA36	35	32	44.2614	0.338695
mir-684	34	21	29.0466	-0.227167
glmS	33	10	13.8317	-1.25449
mir-340	33	22	30.4297	-0.116984
SNORA33	33	20	27.6634	-0.254488
RRE	33	13	17.9812	-0.875976
Gammaretro_CES	31	42	58.0931	0.9061
CsrB	30	14	19.3644	-0.631557
HIV_GSL3	29	6	8.29902	-1.80504
IRES_Aptho	27	14	19.3644	-0.479554
snoMe28S-Am2634	26	49	67.7753	1.38225
IRES_mnt	26	15	20.7475	-0.325571
SNORA25	25	10	13.8317	-0.85395
GEMM_RNA_motif	24	7	9.68219	-1.30963
mir-633	24	11	15.2149	-0.657552
SNORA19	24	13	17.9812	-0.416544
mir-344	23	38	52.5605	1.19234
IRES_Cx43	23	5	6.91585	-1.73366
mir-492	23	13	17.9812	-0.355144
U11	23	20	27.6634	0.266345
MOCO_RNA_motif	22	8	11.0654	-0.991453
mir-28	22	15	20.7475	-0.0845626
SNORA40	22	13	17.9812	-0.291014
SNORA38	22	11	15.2149	-0.532022
rliD	22	5	6.91585	-1.66953
ykkC-yxkD	22	10	13.8317	-0.669525
Purine	21	8	11.0654	-0.924339
SNORA31	21	11	15.2149	-0.464907
SNORD112	21	15	20.7475	-0.0174484
rli28	21	11	15.2149	-0.464907
mir-708	21	7	9.68219	-1.11698
RNaseP_arch	20	8	11.0654	-0.85395
IRES_HCV	20	7	9.68219	-1.04659
PrrB_RsmZ	19	5	6.91585	-1.45802
SNORA63	19	5	6.91585	-1.45802
SNORA51	19	17	23.5139	0.307514
SNORA44	19	7	9.68219	-0.972594
SNORA26	19	4	5.53268	-1.77995
IRES_Pesti	19	5	6.91585	-1.45802
SNORA68	18	7	9.68219	-0.894592
mir-689	17	12	16.598	-0.0345219
SNORD116	17	12	16.598	-0.0345219
SNORA18	17	8	11.0654	-0.619484
OLE	17	9	12.4485	-0.449559
SCARNA6	16	8	11.0654	-0.532022
R2_retro_el	16	14	19.3644	0.275333
mir-692	16	11	15.2149	-0.07259
MIR820	16	17	23.5139	0.555441
PyrR	15	12	16.598	0.14605
MIR811	15	7	9.68219	-0.631557
SNORD115	15	6	8.29902	-0.85395
BsrG	15	7	9.68219	-0.631557
U12	15	16	22.1307	0.561088
U7	14	14	19.3644	0.467978
SNORA23	14	7	9.68219	-0.532022
snoZ247	14	5	6.91585	-1.01745
U4atac	14	10	13.8317	-0.0174484
RtT	13	4	5.53268	-1.23246
ykoK	13	7	9.68219	-0.425106
mir-172	13	5	6.91585	-0.910533
SNORA48	13	5	6.91585	-0.910533
MIR474	13	11	15.2149	0.22697
SNORA1	12	6	8.29902	-0.532022
SNORA76	12	10	13.8317	0.204944
SNORA66	12	5	6.91585	-0.795056
SNORA62	12	16	22.1307	0.883016
SNORA57	12	7	9.68219	-0.309629
SNORA50	12	2	2.76634	-2.11698
MIR159	12	5	6.91585	-0.795056
snoR30	12	4	5.53268	-1.11698
SCARNA14	12	2	2.76634	-2.11698
snR34	12	20	27.6634	1.20494
L20_leader	11	4	5.53268	-0.991453
snoU109	11	5	6.91585	-0.669525
IRES_HIF1	11	8	11.0654	0.00854678
SNORA74	11	8	11.0654	0.00854678
SNORD14	11	6	8.29902	-0.406491
IRES_Bip	10	6	8.29902	-0.268987
SNORA84	10	9	12.4485	0.315975
SNORA16	10	2	2.76634	-1.85395
SNORD50	10	2	2.76634	-1.85395
speF	10	7	9.68219	-0.0465948
MIR845_2	9	3	4.14951	-1.11698
SCARNA8	9	3	4.14951	-1.11698
IRES_Bag1	9	2	2.76634	-1.70195
SNORA5	9	6	8.29902	-0.116984
SNORA3	9	2	2.76634	-1.70195
HIV_POL-1_SL	9	3	4.14951	-1.11698
SNORA75	9	4	5.53268	-0.701947
mir-154	9	4	5.53268	-0.701947
SNORA21	9	3	4.14951	-1.11698
SCARNA23	9	0	0	#NUM!
snoU97	9	9	12.4485	0.467978
SNORA72	8	4	5.53268	-0.532022
snoMe18S-Um1356	8	2	2.76634	-1.53202
SNORA32	8	7	9.68219	0.275333
SNORD77	8	0	0	#NUM!
rliB	8	3	4.14951	-0.947059
snR56	8	4	5.53268	-0.532022
SNORD17	8	13	17.9812	1.16842
snR42	8	20	27.6634	1.78991
snoU89	8	2	2.76634	-1.53202
SECIS	7	3	4.14951	-0.754414
snoR2	7	4	5.53268	-0.339377
HgcC	7	1	1.38317	-2.33938
mir-515	7	3	4.14951	-0.754414
IRES_TrkB	7	2	2.76634	-1.33938
t44	7	5	6.91585	-0.0174484
SL2	7	1	1.38317	-2.33938
mir-652	7	5	6.91585	-0.0174484
rne5	7	1	1.38317	-2.33938
SNORA81	7	3	4.14951	-0.754414
SNORA53	7	5	6.91585	-0.0174484
SNORA20	7	3	4.14951	-0.754414
SNORA13	7	5	6.91585	-0.0174484
snR73	7	2	2.76634	-1.33938
SNORD33	7	0	0	#NUM!
SNORD22	7	2	2.76634	-1.33938
RF_site6	7	1	1.38317	-2.33938
snopsi18S-1377	7	1	1.38317	-2.33938
ACA64	6	6	8.29902	0.467978
SCARNA4	6	1	1.38317	-2.11698
MIR854	6	3	4.14951	-0.532022
SNORA4	6	4	5.53268	-0.116984
MIR807	6	3	4.14951	-0.532022
snoU2-25	6	8	11.0654	0.883016
mir-166	6	5	6.91585	0.204944
SNORA79	6	1	1.38317	-2.11698
snoR128	6	0	0	#NUM!
snosnR60_Z15	6	2	2.76634	-1.11698
snoR116	6	0	0	#NUM!
PrrF	6	1	1.38317	-2.11698
SNORA29	6	6	8.29902	0.467978
MIR164	6	9	12.4485	1.05294
SNORD49	6	1	1.38317	-2.11698
SNORD42	6	1	1.38317	-2.11698
SNORD41	6	0	0	#NUM!
snR65	6	2	2.76634	-1.11698
SNORD27	6	2	2.76634	-1.11698
rli47	6	1	1.38317	-2.11698
mir-283	6	1	1.38317	-2.11698
S15	5	2	2.76634	-0.85395
mir-581	5	3	4.14951	-0.268987
snopsi18S-841	5	0	0	#NUM!
L21_leader	5	2	2.76634	-0.85395
mir-359	5	0	0	#NUM!
SNORA9	5	3	4.14951	-0.268987
RNA-OUT	5	1	1.38317	-1.85395
snoU2-30	5	4	5.53268	0.14605
SNORD19B	5	1	1.38317	-1.85395
mir-196	5	1	1.38317	-1.85395
U1_yeast	5	4	5.53268	0.14605
bicoid_3	5	1	1.38317	-1.85395
mir-929	5	1	1.38317	-1.85395
Vault	5	5	6.91585	0.467978
SNORA27	5	1	1.38317	-1.85395
suhB	5	1	1.38317	-1.85395
SNORD69	5	4	5.53268	0.14605
SNORD63	5	2	2.76634	-0.85395
snR83	5	0	0	#NUM!
SNORD36	5	2	2.76634	-0.85395
snR58	5	2	2.76634	-0.85395
snR51	5	3	4.14951	-0.268987
SNORD18	5	5	6.91585	0.467978
snR43	5	1	1.38317	-1.85395
SCARNA15	5	2	2.76634	-0.85395
snR32	5	4	5.53268	0.14605
P24	5	0	0	#NUM!
snoU85	5	11	15.2149	1.60548
snoZ5	5	2	2.76634	-0.85395
HCV_ARF_SL	5	2	2.76634	-0.85395
snoU83B	5	13	17.9812	1.84649
RprA	4	1	1.38317	-1.53202
SAH_riboswitch	4	1	1.38317	-1.53202
snoU2_19	4	0	0	#NUM!
HIV_PBS	4	6	8.29902	1.05294
IRES_Hsp70	4	1	1.38317	-1.53202
RNAI	4	2	2.76634	-0.532022
snoMBII-202	4	1	1.38317	-1.53202
Prion_pknot	4	1	1.38317	-1.53202
GRIK4_3p_UTR	4	0	0	#NUM!
mini-ykkC	4	3	4.14951	0.0529409
SL1	4	2	2.76634	-0.532022
snosnR69	4	0	0	#NUM!
mir-10	4	3	4.14951	0.0529409
SAM-IV	4	2	2.76634	-0.532022
snR5	4	2	2.76634	-0.532022
snoR160	4	0	0	#NUM!
MIR167_1	4	2	2.76634	-0.532022
IS102	4	1	1.38317	-1.53202
SNORA71	4	1	1.38317	-1.53202
SNORA65	4	1	1.38317	-1.53202
SNORA54	4	7	9.68219	1.27533
GcvB	4	3	4.14951	0.0529409
mir-936	4	4	5.53268	0.467978
Trp_leader	4	2	2.76634	-0.532022
Arthropod_7SK	4	4	5.53268	0.467978
SNORD89	4	1	1.38317	-1.53202
SNORD83	4	1	1.38317	-1.53202
SNORA15	4	6	8.29902	1.05294
SNORD75	4	0	0	#NUM!
SNORD62	4	3	4.14951	0.0529409
SNORD56	4	0	0	#NUM!
snoU6-77	4	1	1.38317	-1.53202
SNORD45	4	2	2.76634	-0.532022
snoZ206	4	0	0	#NUM!
IRES_L-myc	4	2	2.76634	-0.532022
isrA	4	0	0	#NUM!
SCARNA24	4	1	1.38317	-1.53202
snoR31_Z110_Z27	4	1	1.38317	-1.53202
SCARNA20	4	4	5.53268	0.467978
snoR9_plant	4	1	1.38317	-1.53202
snR46	4	2	2.76634	-0.532022
SCARNA13	4	2	2.76634	-0.532022
SCARNA11	4	6	8.29902	1.05294
CoTC_ribozyme	4	3	4.14951	0.0529409
Entero_5_CRE	4	3	4.14951	0.0529409
IRES_c-myc	3	4	5.53268	0.883016
mir-567	3	2	2.76634	-0.116984
mir-891	3	0	0	#NUM!
VA	3	3	4.14951	0.467978
snoZ159	3	0	0	#NUM!
MIR169_5	3	2	2.76634	-0.116984
miR-430	3	1	1.38317	-1.11698
CsrC	3	3	4.14951	0.467978
mir-360	3	3	4.14951	0.467978
SNORA8	3	7	9.68219	1.69037
mir-83	3	1	1.38317	-1.11698
snoZ112	3	0	0	#NUM!
S_pombe_snR95	3	0	0	#NUM!
snoZ101	3	0	0	#NUM!
MIR398	3	2	2.76634	-0.116984
MIR824	3	0	0	#NUM!
mir-306	3	1	1.38317	-1.11698
mir-36	3	1	1.38317	-1.11698
snosnR61	3	4	5.53268	0.883016
snR3	3	0	0	#NUM!
Toga_5_CRE	3	1	1.38317	-1.11698
mir-187	3	0	0	#NUM!
IRES_c-sis	3	4	5.53268	0.883016
snoR137	3	0	0	#NUM!
SNORA69	3	2	2.76634	-0.116984
SNORA67	3	0	0	#NUM!
snoMe28S-Cm3227	3	1	1.38317	-1.11698
SNORA64	3	1	1.38317	-1.11698
IRES_FGF1	3	3	4.14951	0.467978
SNORA52	3	0	0	#NUM!
SNORA49	3	1	1.38317	-1.11698
SNORA41	3	1	1.38317	-1.11698
SAM_alpha	3	4	5.53268	0.883016
SNORD127	3	0	0	#NUM!
SNORD94	3	3	4.14951	0.467978
SNORA30	3	0	0	#NUM!
mir-105	3	1	1.38317	-1.11698
SNORD72	3	4	5.53268	0.883016
rliI	3	0	0	#NUM!
MIR168	3	2	2.76634	-0.116984
SNORD67	3	3	4.14951	0.467978
snoZ223	3	3	4.14951	0.467978
SNORD59	3	0	0	#NUM!
snR82	3	0	0	#NUM!
SNORD43	3	4	5.53268	0.883016
snR67	3	0	0	#NUM!
isrG	3	0	0	#NUM!
SNORD16	3	1	1.38317	-1.11698
Thr_leader	3	0	0	#NUM!
mir-9	3	0	0	#NUM!
mir-7	3	5	6.91585	1.20494
snR45	3	2	2.76634	-0.116984
snoR38	3	2	2.76634	-0.116984
SCARNA18	3	0	0	#NUM!
snR36	3	3	4.14951	0.467978
let-7	3	3	4.14951	0.467978
snR30	3	0	0	#NUM!
snoR26	3	0	0	#NUM!
rli33	3	0	0	#NUM!
mir-278	3	4	5.53268	0.883016
IRES_n-myc	3	3	4.14951	0.467978
snoU43	3	2	2.76634	-0.116984
snoU40	3	1	1.38317	-1.11698
snR39B	3	2	2.76634	-0.116984
mir-263	3	0	0	#NUM!
SNORD121A	3	3	4.14951	0.467978
mir-249	2	0	0	#NUM!
mir-245	2	0	0	#NUM!
ylbH	2	1	1.38317	-0.532022
mir-569	2	0	0	#NUM!
mir-205	2	1	1.38317	-0.532022
mir-552	2	0	0	#NUM!
PK-HAV	2	0	0	#NUM!
snoR32_R81	2	1	1.38317	-0.532022
mir-887	2	1	1.38317	-0.532022
snR191	2	0	0	#NUM!
SCARNA1	2	4	5.53268	1.46798
MIR530	2	3	4.14951	1.05294
SNORD53_SNORD92	2	0	0	#NUM!
mir-339	2	0	0	#NUM!
U1A_PIE	2	0	0	#NUM!
IRES_IGF2	2	0	0	#NUM!
snoZ103	2	3	4.14951	1.05294
mir-73	2	1	1.38317	-0.532022
mir-322	2	0	0	#NUM!
mir-320	2	3	4.14951	1.05294
mir-64	2	0	0	#NUM!
sroD	2	0	0	#NUM!
mir-50	2	3	4.14951	1.05294
MIR815	2	1	1.38317	-0.532022
mir-302	2	0	0	#NUM!
RNAIII	2	1	1.38317	-0.532022
Flavivirus_DB	2	1	1.38317	-0.532022
S_pombe_snR42	2	2	2.76634	0.467978
His_leader	2	1	1.38317	-0.532022
mir-639	2	0	0	#NUM!
mir-192	2	2	2.76634	0.467978
snosnR55	2	0	0	#NUM!
snR8	2	0	0	#NUM!
snR4	2	3	4.14951	1.05294
S_pombe_snR10	2	1	1.38317	-0.532022
mir-612	2	1	1.38317	-0.532022
p27_CRE	2	0	0	#NUM!
snoR135	2	0	0	#NUM!
snoR134	2	0	0	#NUM!
mir-147	2	2	2.76634	0.467978
SNORA58	2	2	2.76634	0.467978
SNORA55	2	1	1.38317	-0.532022
Hammerhead_3	2	0	0	#NUM!
mir-137	2	4	5.53268	1.46798
mir-135	2	1	1.38317	-0.532022
mir-132	2	1	1.38317	-0.532022
SNORA46	2	3	4.14951	1.05294
SNORA43	2	1	1.38317	-0.532022
snoZ266	2	0	0	#NUM!
Sacc_telomerase	2	3	4.14951	1.05294
snoR104	2	1	1.38317	-0.532022
mir-126	2	0	0	#NUM!
mir-124	2	1	1.38317	-0.532022
snoR100	2	2	2.76634	0.467978
SNORA35	2	0	0	#NUM!
SNORD91	2	0	0	#NUM!
U54	2	0	0	#NUM!
SNORD111	2	1	1.38317	-0.532022
SNORA24	2	1	1.38317	-0.532022
SNORD82	2	1	1.38317	-0.532022
SNORD100	2	0	0	#NUM!
SNORA14	2	0	0	#NUM!
SNORA12	2	3	4.14951	1.05294
RyeB	2	0	0	#NUM!
mir-449	2	2	2.76634	0.467978
snR86	2	2	2.76634	0.467978
snR80	2	3	4.14951	1.05294
mir-434	2	0	0	#NUM!
SraG	2	2	2.76634	0.467978
snoR77	2	0	0	#NUM!
SNORD39	2	1	1.38317	-0.532022
SNORD38	2	1	1.38317	-0.532022
SNORD31	2	0	0	#NUM!
SNORD30	2	1	1.38317	-0.532022
mir-412	2	1	1.38317	-0.532022
isrL	2	1	1.38317	-0.532022
isrK	2	4	5.53268	1.46798
snoZ43	2	0	0	#NUM!
MIR477	2	0	0	#NUM!
SNORD12	2	0	0	#NUM!
SNORD11	2	1	1.38317	-0.532022
snoR41	2	0	0	#NUM!
mir-8	2	1	1.38317	-0.532022
mir-2	2	1	1.38317	-0.532022
mir-1	2	1	1.38317	-0.532022
SCARNA17	2	7	9.68219	2.27533
SCARNA16	2	3	4.14951	1.05294
snoR31	2	1	1.38317	-0.532022
snoU90	2	3	4.14951	1.05294
snR35	2	0	0	#NUM!
snoJ33	2	0	0	#NUM!
snoR27	2	1	1.38317	-0.532022
snoR24	2	0	0	#NUM!
rli54	2	0	0	#NUM!
snoZ13_snr52	2	0	0	#NUM!
P16	2	0	0	#NUM!
snoR16	2	1	1.38317	-0.532022
PrfA	2	0	0	#NUM!
snoR12	2	0	0	#NUM!
mir-290	2	2	2.76634	0.467978
MIR171_2	2	0	0	#NUM!
snR11	2	0	0	#NUM!
SraE_OmrA_OmrB	2	1	1.38317	-0.532022
snopsi28S-1192	2	0	0	#NUM!
sar	2	0	0	#NUM!
lin-4	2	1	1.38317	-0.532022
mir-246	1	0	0	#NUM!
mir-244	1	0	0	#NUM!
Tombus_5	1	1	1.38317	0.467978
snoMe28S-U3344	1	2	2.76634	1.46798
snoU19	1	1	1.38317	0.467978
mir-599	1	0	0	#NUM!
mir-590	1	0	0	#NUM!
snoR44_J54	1	0	0	#NUM!
Rota_CRE	1	0	0	#NUM!
mir-228	1	0	0	#NUM!
snoU36a	1	4	5.53268	2.46798
mir-BHRF1-2	1	1	1.38317	0.467978
snoMe28S-Gm1083	1	0	0	#NUM!
mir-219	1	0	0	#NUM!
mir-217	1	0	0	#NUM!
snoZ279_R105_R108	1	0	0	#NUM!
SNORD109A	1	0	0	#NUM!
snoR53Y	1	0	0	#NUM!
mir-208	1	0	0	#NUM!
mir-203	1	0	0	#NUM!
HgcG	1	3	4.14951	2.05294
ACA59	1	0	0	#NUM!
Telomerase-cil	1	1	1.38317	0.467978
PK-repZ	1	0	0	#NUM!
snoU31b	1	0	0	#NUM!
CRISPR-DR49	1	0	0	#NUM!
mir-885	1	0	0	#NUM!
CRISPR-DR33	1	0	0	#NUM!
IRES_HepA	1	0	0	#NUM!
PK-repBA	1	0	0	#NUM!
CRISPR-DR28	1	2	2.76634	1.46798
mir-877	1	0	0	#NUM!
MIR1446	1	0	0	#NUM!
PreQ1	1	0	0	#NUM!
snoZ196	1	1	1.38317	0.467978
snoZ221_snoR21b	1	1	1.38317	0.467978
ATPC	1	1	1.38317	0.467978
snoZ188	1	2	2.76634	1.46798
snoZ162	1	0	0	#NUM!
snR161	1	0	0	#NUM!
IFN_gamma	1	4	5.53268	2.46798
mir-384	1	2	2.76634	1.46798
RsmY	1	1	1.38317	0.467978
snoZ155	1	1	1.38317	0.467978
snoZ152	1	0	0	#NUM!
SgrS	1	0	0	#NUM!
sR3	1	0	0	#NUM!
mir-374	1	0	0	#NUM!
FIE3	1	0	0	#NUM!
mir-802	1	0	0	#NUM!
mir-353	1	0	0	#NUM!
snoMe28S-Am982	1	1	1.38317	0.467978
Tymo_tRNA-like	1	1	1.38317	0.467978
HIV_FE	1	0	0	#NUM!
mir-86	1	0	0	#NUM!
mir-337	1	0	0	#NUM!
snoZ105	1	0	0	#NUM!
mir-75	1	0	0	#NUM!
MIR397	1	0	0	#NUM!
MIR396	1	4	5.53268	2.46798
MIR394	1	2	2.76634	1.46798
MIR828	1	0	0	#NUM!
mir-TAR	1	0	0	#NUM!
mir-676	1	0	0	#NUM!
mir-675	1	0	0	#NUM!
IRES_Cripavirus	1	0	0	#NUM!
sroC	1	0	0	#NUM!
Alfamo_CPB	1	0	0	#NUM!
mir-48	1	0	0	#NUM!
snoTBR17	1	0	0	#NUM!
mir-657	1	0	0	#NUM!
mir-653	1	2	2.76634	1.46798
mir-651	1	2	2.76634	1.46798
mir-34	1	4	5.53268	2.46798
mir-31	1	1	1.38317	0.467978
snosnR71	1	0	0	#NUM!
snoU43C	1	0	0	#NUM!
mir-644	1	0	0	#NUM!
mir-640	1	2	2.76634	1.46798
mir-27	1	0	0	#NUM!
mir-23	1	0	0	#NUM!
snosnR66	1	0	0	#NUM!
snosnR64	1	0	0	#NUM!
mir-1307	1	0	0	#NUM!
mir-15	1	1	1.38317	0.467978
IS128	1	1	1.38317	0.467978
JEV_hairpin	1	0	0	#NUM!
mir-624	1	0	0	#NUM!
LhrA	1	0	0	#NUM!
mir-184	1	1	1.38317	0.467978
mir-181	1	0	0	#NUM!
mir-615	1	0	0	#NUM!
mir-611	1	0	0	#NUM!
23S-methyl	1	0	0	#NUM!
rncO	1	0	0	#NUM!
mir-160	1	5	6.91585	2.78991
ctRNA_pT181	1	0	0	#NUM!
snoZ102_R77	1	0	0	#NUM!
mir-144	1	2	2.76634	1.46798
snoZ278	1	1	1.38317	0.467978
mir-938	1	0	0	#NUM!
mir-499	1	0	0	#NUM!
mir-138	1	0	0	#NUM!
mir-498	1	0	0	#NUM!
snoR113	1	0	0	#NUM!
snoR111	1	0	0	#NUM!
mir-133	1	1	1.38317	0.467978
SNORA47	1	1	1.38317	0.467978
RyhB	1	0	0	#NUM!
STnc490k	1	0	0	#NUM!
mir-924	1	0	0	#NUM!
snoR109	1	0	0	#NUM!
snoR103	1	1	1.38317	0.467978
SNORD125	1	0	0	#NUM!
SNORD123	1	0	0	#NUM!
Flavi_CRE	1	0	0	#NUM!
sR46	1	0	0	#NUM!
sR44	1	0	0	#NUM!
Corona_pk3	1	0	0	#NUM!
Leu_leader	1	0	0	#NUM!
SNORA22	1	3	4.14951	2.05294
SraC_RyeA	1	1	1.38317	0.467978
sR32	1	0	0	#NUM!
SNORD107	1	0	0	#NUM!
SNORD79	1	2	2.76634	1.46798
SNORD78	1	0	0	#NUM!
mir-101	1	0	0	#NUM!
GP_knot1	1	0	0	#NUM!
purD	1	1	1.38317	0.467978
snoR8a	1	1	1.38317	0.467978
mir-458	1	0	0	#NUM!
snoR99	1	1	1.38317	0.467978
snoR98	1	0	0	#NUM!
SNORD65	1	0	0	#NUM!
SNORD64	1	2	2.76634	1.46798
BsrF	1	1	1.38317	0.467978
SNORD61	1	0	0	#NUM!
SNORD58	1	1	1.38317	0.467978
Rhino_CRE	1	9	12.4485	3.6379
snoR83	1	1	1.38317	0.467978
SNORD51	1	0	0	#NUM!
L19_leader	1	0	0	#NUM!
snR84	1	2	2.76634	1.46798
DPB	1	0	0	#NUM!
SNORD44	1	0	0	#NUM!
preQ1-II	1	0	0	#NUM!
snoR74	1	3	4.14951	2.05294
snR78	1	0	0	#NUM!
snR77	1	0	0	#NUM!
snR76	1	1	1.38317	0.467978
IRES_Kv1_4	1	1	1.38317	0.467978
SNORD37	1	1	1.38317	0.467978
SNORD34	1	0	0	#NUM!
snoR64	1	0	0	#NUM!
snoR4a	1	0	0	#NUM!
SNORD29	1	1	1.38317	0.467978
SNORD25	1	0	0	#NUM!
SNORD24	1	2	2.76634	1.46798
isrP	1	1	1.38317	0.467978
isrO	1	0	0	#NUM!
isrN	1	1	1.38317	0.467978
snR50	1	0	0	#NUM!
MIR478	1	2	2.76634	1.46798
SNORD19	1	4	5.53268	2.46798
MIR475	1	1	1.38317	0.467978
snR49	1	0	0	#NUM!
SCARNA21	1	1	1.38317	0.467978
snoMe28S-Am2589	1	0	0	#NUM!
snoZ39	1	0	0	#NUM!
mir-5	1	0	0	#NUM!
TLS-PK3	1	0	0	#NUM!
TLS-PK2	1	0	0	#NUM!
snoPyro_CD	1	0	0	#NUM!
snR39	1	0	0	#NUM!
snR37	1	0	0	#NUM!
snR31	1	3	4.14951	2.05294
CopA	1	2	2.76634	1.46798
IRES_VEGF_A	1	2	2.76634	1.46798
bantam	1	0	0	#NUM!
P15	1	0	0	#NUM!
snoZ17	1	1	1.38317	0.467978
P11	1	1	1.38317	0.467978
RSV_PBS	1	1	1.38317	0.467978
MIR444	1	2	2.76634	1.46798
rli43	1	0	0	#NUM!
MIR171_1	1	1	1.38317	0.467978
snR13	1	3	4.14951	2.05294
snR10	1	2	2.76634	1.46798
sn2524	1	0	0	#NUM!
mir-287	1	1	1.38317	0.467978
STnc500	1	0	0	#NUM!
HepE_CRE	1	1	1.38317	0.467978
snoU54	1	0	0	#NUM!
mir-275	1	0	0	#NUM!
mir-268	1	0	0	#NUM!
mir-253	1	0	0	#NUM!
IRES_EBNA	1	0	0	#NUM!
S-element	1	1	1.38317	0.467978
HCV_SLVII	0	2	2.76634	#DIV/0!
mir-234	0	1	1.38317	#DIV/0!
mir-223	0	1	1.38317	#DIV/0!
mir-582	0	1	1.38317	#DIV/0!
snopsi28S-3316	0	1	1.38317	#DIV/0!
ctRNA_pGA1	0	2	2.76634	#DIV/0!
MIR1151	0	2	2.76634	#DIV/0!
mir-210	0	1	1.38317	#DIV/0!
CRISPR-DR59	0	2	2.76634	#DIV/0!
NRON	0	1	1.38317	#DIV/0!
snoZ178	0	6	8.29902	#DIV/0!
mir-399	0	4	5.53268	#DIV/0!
mir-395	0	3	4.14951	#DIV/0!
SCARNA3	0	1	1.38317	#DIV/0!
MIR535	0	1	1.38317	#DIV/0!
snoZ157	0	1	1.38317	#DIV/0!
MIR529	0	1	1.38317	#DIV/0!
mir-iab-4	0	1	1.38317	#DIV/0!
STnc150	0	1	1.38317	#DIV/0!
HLE	0	1	1.38317	#DIV/0!
ROSE	0	1	1.38317	#DIV/0!
mir-346	0	1	1.38317	#DIV/0!
mir-87	0	2	2.76634	#DIV/0!
QUAD	0	1	1.38317	#DIV/0!
S_pombe_snR98	0	1	1.38317	#DIV/0!
CPEB3_ribozyme	0	2	2.76634	#DIV/0!
snoMe18S-Gm1358	0	1	1.38317	#DIV/0!
mir-326	0	1	1.38317	#DIV/0!
mir-317	0	2	2.76634	#DIV/0!
mir-315	0	6	8.29902	#DIV/0!
QaRNA	0	1	1.38317	#DIV/0!
mir-650	0	5	6.91585	#DIV/0!
mir-24	0	1	1.38317	#DIV/0!
mir-636	0	1	1.38317	#DIV/0!
mir-631	0	1	1.38317	#DIV/0!
mir-16	0	1	1.38317	#DIV/0!
mir-194	0	2	2.76634	#DIV/0!
PK-IAV	0	1	1.38317	#DIV/0!
HBV	0	1	1.38317	#DIV/0!
SNORA77	0	3	4.14951	#DIV/0!
CAESAR	0	1	1.38317	#DIV/0!
IRES_FGF2	0	1	1.38317	#DIV/0!
SNORA56	0	1	1.38317	#DIV/0!
snoR114	0	5	6.91585	#DIV/0!
snoZ267	0	1	1.38317	#DIV/0!
mir-489	0	1	1.38317	#DIV/0!
mir-128	0	1	1.38317	#DIV/0!
SNORD99	0	1	1.38317	#DIV/0!
SNORD96	0	1	1.38317	#DIV/0!
SNORD95	0	1	1.38317	#DIV/0!
SNORD110	0	2	2.76634	#DIV/0!
SNORD88	0	2	2.76634	#DIV/0!
SNORD105	0	1	1.38317	#DIV/0!
SNORD103	0	1	1.38317	#DIV/0!
mir-463	0	1	1.38317	#DIV/0!
SNORD74	0	1	1.38317	#DIV/0!
SNORD70	0	3	4.14951	#DIV/0!
mir-454	0	1	1.38317	#DIV/0!
SNORD66	0	1	1.38317	#DIV/0!
sR14	0	4	5.53268	#DIV/0!
SNORD60	0	2	2.76634	#DIV/0!
PK1-TEV_CVMV	0	1	1.38317	#DIV/0!
SNORD47	0	1	1.38317	#DIV/0!
SNORD46	0	3	4.14951	#DIV/0!
SraB	0	1	1.38317	#DIV/0!
snR70	0	1	1.38317	#DIV/0!
mir-425	0	1	1.38317	#DIV/0!
mir-422	0	2	2.76634	#DIV/0!
sucA	0	1	1.38317	#DIV/0!
STnc560	0	1	1.38317	#DIV/0!
SNORD28	0	1	1.38317	#DIV/0!
MicC	0	1	1.38317	#DIV/0!
mir-770	0	1	1.38317	#DIV/0!
SNORD23	0	5	6.91585	#DIV/0!
GAIT	0	1	1.38317	#DIV/0!
mir-767	0	1	1.38317	#DIV/0!
ctRNA_pND324	0	1	1.38317	#DIV/0!
snoZ30	0	3	4.14951	#DIV/0!
snoR35	0	1	1.38317	#DIV/0!
snoR28	0	2	2.76634	#DIV/0!
snoR21	0	1	1.38317	#DIV/0!
snoZ161_228	0	1	1.38317	#DIV/0!
snoR11	0	1	1.38317	#DIV/0!
DsrA	0	1	1.38317	#DIV/0!
BTE	0	4	5.53268	#DIV/0!
mir-279	0	2	2.76634	#DIV/0!
mir-277	0	1	1.38317	#DIV/0!
snoU105B	0	3	4.14951	#DIV/0!
MIR408	0	1	1.38317	#DIV/0!
mir-250	0	1	1.38317	#DIV/0!
sum	62205	34150	47235.3	-0.397167

## Sheet: rfam_10_2MM
name	GP	GP(TaDREB3)	GP(TaDREB3)_norm	log2
SSU_rRNA_5	30044	9932	13737.6	-1.12894
U4	3344	5884	8138.57	1.2832
tRNA	2947	2256	3120.43	0.0824984
5S_rRNA	2684	1478	2044.33	-0.39276
7SK	1846	1015	1403.92	-0.394944
Intron_gpII	1655	1457	2015.28	0.284148
U6	1409	759	1049.83	-0.424521
mir-544	1321	900	1244.85	-0.0856552
Intron_gpI	1263	623	861.715	-0.551572
T-box	1031	679	939.172	-0.134582
SRP_euk_arch	661	454	627.959	-0.0739796
mir-548	582	308	426.016	-0.45011
MIR812	579	214	295.998	-0.967974
mir-598	563	329	455.063	-0.307069
RSV_RNA	506	278	384.521	-0.396074
5_8S_rRNA	497	322	445.381	-0.158207
SNORA7	472	328	453.68	-0.0571126
tmRNA	453	310	428.783	-0.0792644
mir-1302	446	318	439.848	-0.0200385
Cobalamin	445	286	395.587	-0.169812
MIR806	426	139	192.261	-1.14779
RNaseP_bact_a	425	249	344.409	-0.303339
U3	421	253	349.942	-0.266704
mir-562	403	228	315.363	-0.353768
U2	375	228	315.363	-0.249878
MIR1122	373	184	254.503	-0.551491
MIR821	265	129	178.429	-0.570643
Alpha_RBS	265	210	290.466	0.132375
LR-PK1	260	178	246.204	-0.078656
TPP	237	149	206.092	-0.201596
U1	234	138	190.877	-0.293862
C0719	231	65	89.906	-1.3614
mir-1255	211	128	177.046	-0.253121
SNORA61	184	78	107.887	-0.770181
Y_RNA	173	124	171.513	-0.0124535
SNORA28	167	90	124.485	-0.423873
Hammerhead_1	147	69	95.4387	-0.623169
mir-649	126	51	70.5417	-0.836876
U5	109	112	154.915	0.507149
SNORA17	101	75	103.738	0.0385856
SNORD15	95	47	65.009	-0.547288
FMN	90	41	56.71	-0.666323
UnaL2	89	56	77.4575	-0.2004
Lysine	88	39	53.9436	-0.706051
snoU13	85	36	49.7941	-0.771488
RNaseP_nuc	85	84	116.186	0.450905
6S	79	51	70.5417	-0.163377
snoZ185	76	130	179.812	1.24242
SAM	73	35	48.4109	-0.592563
Telomerase-vert	71	64	88.5229	0.318231
PK-G12rRNA	66	54	74.6912	0.178472
K_chan_RES	66	45	62.2426	-0.0845626
MPMV_package	65	44	60.8595	-0.0949578
Glycine	64	29	40.1119	-0.674041
RNaseP_bact_b	62	19	26.2802	-1.23829
SNORA11	61	44	60.8595	-0.00332732
MIR480	59	23	31.8129	-0.891103
U8	58	21	29.0466	-0.997685
mir-156	56	133	183.962	1.71591
mir-584	55	43	59.4763	0.112883
yybP-ykoY	52	27	37.3456	-0.477574
L10_leader	51	22	30.4297	-0.745015
lsrR	49	15	20.7475	-1.23984
U6atac	47	29	40.1119	-0.228629
SNORA70	45	25	34.5792	-0.380019
SRP_bact	44	36	49.7941	0.178472
snoR71	44	28	38.7288	-0.184098
snoZ199	43	36	49.7941	0.211639
IRES_Picorna	41	15	20.7475	-0.982683
SNORD113	39	13	17.9812	-1.11698
ydaO-yuaA	39	32	44.2614	0.182576
MIR169_2	37	37	51.1773	0.467978
RNase_MRP	37	38	52.5605	0.506453
SNORA2	36	15	20.7475	-0.795056
SNORA73	36	20	27.6634	-0.380019
mir-324	35	26	35.9624	0.0391351
SNORA42	35	28	38.7288	0.14605
SNORA36	35	32	44.2614	0.338695
mir-684	34	21	29.0466	-0.227167
glmS	33	10	13.8317	-1.25449
mir-340	33	22	30.4297	-0.116984
SNORA33	33	20	27.6634	-0.254488
RRE	33	13	17.9812	-0.875976
Gammaretro_CES	31	42	58.0931	0.9061
CsrB	30	14	19.3644	-0.631557
HIV_GSL3	29	6	8.29902	-1.80504
IRES_Aptho	27	14	19.3644	-0.479554
snoMe28S-Am2634	26	49	67.7753	1.38225
IRES_mnt	26	15	20.7475	-0.325571
SNORA25	25	10	13.8317	-0.85395
GEMM_RNA_motif	24	7	9.68219	-1.30963
mir-633	24	11	15.2149	-0.657552
SNORA19	24	13	17.9812	-0.416544
mir-344	23	38	52.5605	1.19234
IRES_Cx43	23	5	6.91585	-1.73366
mir-492	23	13	17.9812	-0.355144
U11	23	20	27.6634	0.266345
MOCO_RNA_motif	22	8	11.0654	-0.991453
mir-28	22	15	20.7475	-0.0845626
SNORA40	22	13	17.9812	-0.291014
SNORA38	22	11	15.2149	-0.532022
rliD	22	5	6.91585	-1.66953
ykkC-yxkD	22	10	13.8317	-0.669525
Purine	21	8	11.0654	-0.924339
SNORA31	21	11	15.2149	-0.464907
SNORD112	21	15	20.7475	-0.0174484
rli28	21	11	15.2149	-0.464907
mir-708	21	7	9.68219	-1.11698
RNaseP_arch	20	8	11.0654	-0.85395
IRES_HCV	20	7	9.68219	-1.04659
PrrB_RsmZ	19	5	6.91585	-1.45802
SNORA63	19	5	6.91585	-1.45802
SNORA51	19	17	23.5139	0.307514
SNORA44	19	7	9.68219	-0.972594
SNORA26	19	4	5.53268	-1.77995
IRES_Pesti	19	5	6.91585	-1.45802
SNORA68	18	7	9.68219	-0.894592
mir-689	17	12	16.598	-0.0345219
SNORD116	17	12	16.598	-0.0345219
SNORA18	17	8	11.0654	-0.619484
OLE	17	9	12.4485	-0.449559
SCARNA6	16	8	11.0654	-0.532022
R2_retro_el	16	14	19.3644	0.275333
mir-692	16	11	15.2149	-0.07259
MIR820	16	17	23.5139	0.555441
PyrR	15	12	16.598	0.14605
MIR811	15	7	9.68219	-0.631557
SNORD115	15	6	8.29902	-0.85395
BsrG	15	7	9.68219	-0.631557
U12	15	16	22.1307	0.561088
U7	14	14	19.3644	0.467978
SNORA23	14	7	9.68219	-0.532022
snoZ247	14	5	6.91585	-1.01745
U4atac	14	10	13.8317	-0.0174484
RtT	13	4	5.53268	-1.23246
ykoK	13	7	9.68219	-0.425106
mir-172	13	5	6.91585	-0.910533
SNORA48	13	5	6.91585	-0.910533
MIR474	13	11	15.2149	0.22697
SNORA1	12	6	8.29902	-0.532022
SNORA76	12	10	13.8317	0.204944
SNORA66	12	5	6.91585	-0.795056
SNORA62	12	16	22.1307	0.883016
SNORA57	12	7	9.68219	-0.309629
SNORA50	12	2	2.76634	-2.11698
MIR159	12	5	6.91585	-0.795056
snoR30	12	4	5.53268	-1.11698
SCARNA14	12	2	2.76634	-2.11698
snR34	12	20	27.6634	1.20494
L20_leader	11	4	5.53268	-0.991453
snoU109	11	5	6.91585	-0.669525
IRES_HIF1	11	8	11.0654	0.00854678
SNORA74	11	8	11.0654	0.00854678
SNORD14	11	6	8.29902	-0.406491
IRES_Bip	10	6	8.29902	-0.268987
SNORA84	10	9	12.4485	0.315975
SNORA16	10	2	2.76634	-1.85395
SNORD50	10	2	2.76634	-1.85395
speF	10	7	9.68219	-0.0465948
SNORD17	8	13	17.9812	1.16842
snR42	8	20	27.6634	1.78991
snoU85	5	11	15.2149	1.60548
snoU83B	5	13	17.9812	1.84649
sum	61581	33439	46251.8	-0.412975
